# Supplementary material for: How Lazy Are Pet Cats Really? Using Machine Learning and Accelerometry to Get a Glimpse into the Behaviour of Privately Owned Cats in Different Households
Source: MDPI journal article supplement (doi:10.3390/s24082623), 2024-04-19
Supplement: s1 [file s1]

## Supplementary Material 2 – Questionnaire

You are being invited to take part in a research study part of a doctoral study. This research will study the behaviour and physical activity of domestic cats in a home environment. To participate in this study, you will need to fill out this questionnaire.

More information on this study can be found in the information leaflet.  
The questionnaire will take approximately 5-10 minutes.

**\*Required**

---

I have read the provided information and agree that research data gathered for this study may be published or made available provided my name or other identifying information is not used \*

☐ I agree

I understand that I am free to withdraw from this study at any time \*

☐ I agree

---

### Contact information

First and last name \*

E-Mail Address \*

Phone number \*

How would you prefer to be contacted? \*

*Select one answer*

☐ E-mail

☐ Phone

## Household information

What is your age category? \*

*Select one answer*

- ☐ < 18 years
- ☐ 18 – 24 years
- ☐ 25 – 34 years
- ☐ 35 – 44 years
- ☐ 45 – 54 years
- ☐ 55 – 64 years
- ☐ > 65 years

How many adults (18 years or older) are present in the household? \*

*Select one answer*

- ☐ 0
- ☐ 1
- ☐ 2
- ☐ 3 or more

How many children (< 18 years) are present in the household? \*

*Select one answer*

- ☐ 0
- ☐ 1
- ☐ 2
- ☐ 3 or more

Please specify the age category or categories of the child(ren) present in the household?

*More than one answer possible*

- ☐ Baby (up to 1 year)
- ☐ Toddler (1 – 3 years)
- ☐ Preschooler (3 – 5 years)
- ☐ School age (6 – 12 years)
- ☐ Teenager (13 – 18 years)



Select the gender for your cat(s) \*

Select one answer for each cat

|       | Entire male           | Neutered male         | Entire female         | Neutered female       |
|-------|-----------------------|-----------------------|-----------------------|-----------------------|
| Cat 1 | <input type="radio"/> | <input type="radio"/> | <input type="radio"/> | <input type="radio"/> |
| Cat 2 | <input type="radio"/> | <input type="radio"/> | <input type="radio"/> | <input type="radio"/> |
| Cat 3 | <input type="radio"/> | <input type="radio"/> | <input type="radio"/> | <input type="radio"/> |
| Cat 4 | <input type="radio"/> | <input type="radio"/> | <input type="radio"/> | <input type="radio"/> |

Is your cat known with any of the following illnesses? \*

Please select the illness(es) that apply to your cat(s)

|       | Mobility-related illness (e.g. osteoarthritis, fractures) | Urinary tract/kidney disease | Diabetes                 | Hyperthyroid             |
|-------|-----------------------------------------------------------|------------------------------|--------------------------|--------------------------|
| Cat 1 | <input type="checkbox"/>                                  | <input type="checkbox"/>     | <input type="checkbox"/> | <input type="checkbox"/> |
| Cat 2 | <input type="checkbox"/>                                  | <input type="checkbox"/>     | <input type="checkbox"/> | <input type="checkbox"/> |
| Cat 3 | <input type="checkbox"/>                                  | <input type="checkbox"/>     | <input type="checkbox"/> | <input type="checkbox"/> |
| Cat 4 | <input type="checkbox"/>                                  | <input type="checkbox"/>     | <input type="checkbox"/> | <input type="checkbox"/> |

Select the living condition of your cat(s) \*

Select one answer for each cat

|       | Exclusively indoors   | Indoors with outdoor access | Exclusively outdoors  | Other                 |
|-------|-----------------------|-----------------------------|-----------------------|-----------------------|
| Cat 1 | <input type="radio"/> | <input type="radio"/>       | <input type="radio"/> | <input type="radio"/> |
| Cat 2 | <input type="radio"/> | <input type="radio"/>       | <input type="radio"/> | <input type="radio"/> |
| Cat 3 | <input type="radio"/> | <input type="radio"/>       | <input type="radio"/> | <input type="radio"/> |
| Cat 4 | <input type="radio"/> | <input type="radio"/>       | <input type="radio"/> | <input type="radio"/> |

If you answered "Other" in the previous question, please describe the living condition of your cat(s)

---

---

---

---

---

Is your cat used to wearing a collar and/or harness? \*

Select one answer for each cat

|       | Collar                | Harness               | Collar & harness      | Neither               |
|-------|-----------------------|-----------------------|-----------------------|-----------------------|
| Cat 1 | <input type="radio"/> | <input type="radio"/> | <input type="radio"/> | <input type="radio"/> |
| Cat 2 | <input type="radio"/> | <input type="radio"/> | <input type="radio"/> | <input type="radio"/> |
| Cat 3 | <input type="radio"/> | <input type="radio"/> | <input type="radio"/> | <input type="radio"/> |
| Cat 4 | <input type="radio"/> | <input type="radio"/> | <input type="radio"/> | <input type="radio"/> |

## Cat safety collar

To ensure the safety of your cat throughout the study, a cat quick release collar is required while your cat wears the activity monitor. Quick release collars have a type of clasp that pops open easily when force is applied. Below you can see the difference between a quick release collar and traditional collar.

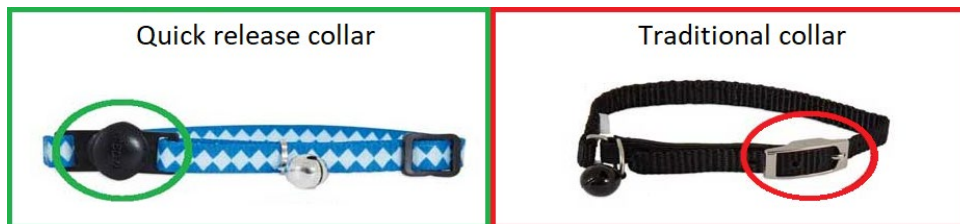

Do you own a cat quick release collar? \*

Select one answer

- ☐ Yes  
☐ No

*If you do not own a cat quick release collar, one will be provided during the study.*

## End of questionnaire

You have reached the end of the questionnaire. Thank you for your interest in this study and for completing this questionnaire. Depending on how many people are interested in participating in this study, a selection might be made. You will be informed if you are selected to participate in the study no later than mid November 2022.
